# Supplementary material for: AutoDock VinaXB: implementation of XBSF, new empirical halogen bond scoring function, into AutoDock Vina
Source: PubMed Central journal article supplement (PMC4870740; doi:10.1186/s13321-016-0139-1), 2016-05-18
Supplement: 13321_2016_139_MOESM7_ESM.pdf [file 13321_2016_139_MOESM7_ESM.pdf]

## Signed Rank Test for Vinaxb and Vina, calculated off the difference score $Vinaxb - Vina = Diff$

### The UNIVARIATE Procedure

Variable: diff

| Moments                |            |                         |            |
|------------------------|------------|-------------------------|------------|
| <b>N</b>               | 106        | <b>Sum Weights</b>      | 106        |
| <b>Mean</b>            | -0.1934272 | <b>Sum Observations</b> | -20.503288 |
| <b>Std Deviation</b>   | 1.28548048 | <b>Variance</b>         | 1.65246007 |
| <b>Skewness</b>        | -0.3968439 | <b>Kurtosis</b>         | 4.25844178 |
| <b>Uncorrected SS</b>  | 177.474202 | <b>Corrected SS</b>     | 173.508307 |
| <b>Coeff Variation</b> | -664.58087 | <b>Std Error Mean</b>   | 0.1248569  |

| Basic Statistical Measures |          |                            |         |
|----------------------------|----------|----------------------------|---------|
| Location                   |          | Variability                |         |
| <b>Mean</b>                | -0.19343 | <b>Std Deviation</b>       | 1.28548 |
| <b>Median</b>              | -0.03078 | <b>Variance</b>            | 1.65246 |
| <b>Mode</b>                | .        | <b>Range</b>               | 9.60960 |
|                            |          | <b>Interquartile Range</b> | 0.33905 |

| Tests for Location: $\mu_0=0$ |           |          |                     |        |
|-------------------------------|-----------|----------|---------------------|--------|
| Test                          | Statistic |          | p Value             |        |
| <b>Student's t</b>            | <b>t</b>  | -1.54919 | <b>Pr &gt;  t </b>  | 0.1243 |
| <b>Sign</b>                   | <b>M</b>  | -14      | <b>Pr &gt;=  M </b> | 0.0084 |
| <b>Signed Rank</b>            | <b>S</b>  | -751.5   | <b>Pr &gt;=  S </b> | 0.0171 |

| Quantiles (Definition 5) |           |
|--------------------------|-----------|
| Level                    | Quantile  |
| <b>100% Max</b>          | 4.7619127 |
| <b>99%</b>               | 2.7043606 |
| <b>95%</b>               | 2.0235827 |
| <b>90%</b>               | 0.6960297 |

## Signed Rank Test for Vinaxb and Vina, calculated off the difference score $Vinaxb - Vina = Diff$

The UNIVARIATE Procedure

Variable: diff

| Quantiles (Definition 5) |            |
|--------------------------|------------|
| Level                    | Quantile   |
| 75% Q3                   | 0.0444254  |
| 50% Median               | -0.0307785 |
| 25% Q1                   | -0.2946197 |
| 10%                      | -1.8982790 |
| 5%                       | -2.9657658 |
| 1%                       | -3.8472232 |
| 0% Min                   | -4.8476908 |

| Extreme Observations |     |         |     |
|----------------------|-----|---------|-----|
| Lowest               |     | Highest |     |
| Value                | Obs | Value   | Obs |
| -4.84769             | 106 | 2.42230 | 62  |
| -3.84722             | 64  | 2.45893 | 33  |
| -3.69770             | 49  | 2.49136 | 26  |
| -3.31856             | 38  | 2.70436 | 99  |
| -3.16145             | 6   | 4.76191 | 104 |
