# Supplementary material for: AutoDock VinaXB: implementation of XBSF, new empirical halogen bond scoring function, into AutoDock Vina
Source: PubMed Central journal article supplement (PMC4870740; doi:10.1186/s13321-016-0139-1), 2016-05-18
Supplement: 13321_2016_139_MOESM8_ESM.pdf [file 13321_2016_139_MOESM8_ESM.pdf]

## Signed Rank Test for Vinaxb and Vina, calculated off the difference score $Vinaxb - Vina = Diff$ on RMSD Data

### The UNIVARIATE Procedure

Variable: diff

| Moments                |            |                         |            |
|------------------------|------------|-------------------------|------------|
| <b>N</b>               | 106        | <b>Sum Weights</b>      | 106        |
| <b>Mean</b>            | -0.2154804 | <b>Sum Observations</b> | -22.840921 |
| <b>Std Deviation</b>   | 0.74617523 | <b>Variance</b>         | 0.55677747 |
| <b>Skewness</b>        | -3.1579204 | <b>Kurtosis</b>         | 15.7890138 |
| <b>Uncorrected SS</b>  | 63.3834047 | <b>Corrected SS</b>     | 58.4616343 |
| <b>Coeff Variation</b> | -346.28453 | <b>Std Error Mean</b>   | 0.07247494 |

| Basic Statistical Measures |          |                            |         |
|----------------------------|----------|----------------------------|---------|
| Location                   |          | Variability                |         |
| <b>Mean</b>                | -0.21548 | <b>Std Deviation</b>       | 0.74618 |
| <b>Median</b>              | -0.03315 | <b>Variance</b>            | 0.55678 |
| <b>Mode</b>                | .        | <b>Range</b>               | 6.62380 |
|                            |          | <b>Interquartile Range</b> | 0.25432 |

| Tests for Location: $\mu_0=0$ |           |          |                     |        |
|-------------------------------|-----------|----------|---------------------|--------|
| Test                          | Statistic |          | p Value             |        |
| <b>Student's t</b>            | <b>t</b>  | -2.97317 | <b>Pr &gt;  t </b>  | 0.0037 |
| <b>Sign</b>                   | <b>M</b>  | -20      | <b>Pr &gt;=  M </b> | 0.0001 |
| <b>Signed Rank</b>            | <b>S</b>  | -1278.5  | <b>Pr &gt;=  S </b> | <.0001 |

| Quantiles (Definition 5) |           |
|--------------------------|-----------|
| Level                    | Quantile  |
| <b>100% Max</b>          | 1.8301727 |
| <b>99%</b>               | 0.8379079 |
| <b>95%</b>               | 0.4092166 |
| <b>90%</b>               | 0.2075898 |

## Signed Rank Test for Vinaxb and Vina, calculated off the difference score $Vinaxb - Vina = Diff$ on RMSD Data

The UNIVARIATE Procedure

Variable: diff

| Quantiles (Definition 5) |            |
|--------------------------|------------|
| Level                    | Quantile   |
| 75% Q3                   | 0.0128162  |
| 50% Median               | -0.0331516 |
| 25% Q1                   | -0.2415053 |
| 10%                      | -0.7655052 |
| 5%                       | -1.6469397 |
| 1%                       | -3.0428478 |
| 0% Min                   | -4.7936242 |

| Extreme Observations |     |          |     |
|----------------------|-----|----------|-----|
| Lowest               |     | Highest  |     |
| Value                | Obs | Value    | Obs |
| -4.79362             | 49  | 0.438189 | 21  |
| -3.04285             | 1   | 0.686546 | 42  |
| -2.63492             | 33  | 0.774384 | 15  |
| -1.90671             | 52  | 0.837908 | 71  |
| -1.68234             | 3   | 1.830173 | 44  |
