# Supplementary material for: AutoDock VinaXB: implementation of XBSF, new empirical halogen bond scoring function, into AutoDock Vina
Source: J Cheminform. 2016 May 18;8:27. doi: 10.1186/s13321-016-0139-1 (PMC4870740; doi:10.1186/s13321-016-0139-1)
Supplement: Supplementary file 9 — 10.1186/s13321-016-0139-1 Halogen pdbbind energy. [file 13321_2016_139_MOESM9_ESM.xlsx]

## Sheet: Sheet1
PDB	Energy
1xzx	Kd=0.06nM
1zog	Ki=70nM
2oxd	Ki=0.15uM
2q7q	Kd=5uM
2vnt	Ki=9.9nM
2w0s	Kd=0.5mM
2zm3	Kd=0.614uM
3c84	Kd=14nM
3cso	Ki=1.7uM
3d1g	Ki=10uM
3gws	Kd=0.081nM
3hll	Ki=5.8nM
3jya	Ki=0.1301uM
3kku	Ki=2uM
3kr1	Kd=1.8uM
3n7s	Kd=20nM
3p8h	Kd=5uM
3p8n	Ki=0.53nM
3tfp	Ki=0.34uM
3ug2	Kd=5.6nM
4agl	Kd=225uM
4agn	Kd=107uM
4ago	Kd=15.5uM
4agp	Kd=20.6uM
4agq	Kd=9.7uM
6std	Ki=2.3nM
